# Supplementary material
Source: Elsevier journal article supplement (https://www.sciencedirect.com/science/article/pii/S0210569120301029)
Supplement: mmc1 [file S0210569120301029:mmc1.pdf]

| Reference | Title of the work                                                                                                                                             | Authors           | Year |
|-----------|---------------------------------------------------------------------------------------------------------------------------------------------------------------|-------------------|------|
| 36        | A New Effective Machine Learning Framework for Sepsis Diagnosis                                                                                               | Wang, X. et al.   | 2018 |
| 37        | Learning representations for the early detection of sepsis with deep neural networks                                                                          | Kam and Kim       | 2017 |
| 38        | An Improved Multi-Output Gaussian Process RNN with Real-Time Validation for Early Sepsis Detection                                                            | Futoma et al.     | 2017 |
| 39        | Predict Sepsis Level in Intensive Medicine – Data Mining Approach                                                                                             | Gonçalves et al.  | 2013 |
| 40        | Early detection of sepsis in the emergency department using Dynamic Bayesian Networks                                                                         | Nachimuthu et al. | 2012 |
| 41        | Prediction of Sepsis in the Intensive Care Unit With Minimal Electronic Health Record Data: A Machine Learning Approach.                                      | Desautels et al.  | 2016 |
| 42        | Multicentre validation of a sepsis prediction algorithm using only vital sign data in the emergency department, general ward and ICU                          | Mao et al.        | 2018 |
| 43        | Development and Evaluation of a Machine Learning Model for the Early Identification of Patients at Risk for Sepsis                                            | Delahanty et al.  | 2019 |
| 44        | Machine-Learning-Based Laboratory Developed Test for the Diagnosis of Sepsis in High-Risk Patients                                                            | Calvert et al.    | 2019 |
| 45        | Evaluation of a machine learning algorithm for up to 48-hour-advance prediction of sepsis using six vital signs                                               | Barton et al.     | 2019 |
| 46        | Development and Validation of an Automated Sepsis Risk Assessment System                                                                                      | Back et al.       | 2016 |
| 47        | Development and External Validation of an Automated Computer-Aided Risk Score for Predicting Sepsis in Emergency Medical Admissions Using the Patient's First | Faisal et al.     | 2018 |
| 48        | Creating an automated trigger for sepsis clinical decision support at emergency department triage using machine learning                                      | Horng et al.      | 2017 |
| 49        | Non-invasive classification of severe sepsis and systemic inflammatory response syndrome using a nonlinear support vector machine: a preliminar study         | Tang et al.       | 2010 |

|    |                                                                                                                                      |                   |      |
|----|--------------------------------------------------------------------------------------------------------------------------------------|-------------------|------|
| 50 | Natural language processing of electronic medical records can identify sepsis following orthopedic surgery                           | Arvind et al.     | 2018 |
| 51 | Leveraging implicit expert knowledge for non-circular machine learning in sepsis prediction                                          | Schamoni. et. al. | 2019 |
| 52 | Predicting sepsis with a recurrent neural network using the MIMIC III database                                                       | Scherpf et al.    | 2019 |
| 53 | An attention based deep learning model of clinical events in the intensive care unit                                                 | Kaji et al.       | 2019 |
| 54 | LiSep LSTM: A Machine Learning Algorithm for Early Detection of Septic Shock                                                         | Fagerström et al  | 2019 |
| 55 | Predictive models of sepsis in adult ICU patients                                                                                    | Wang, R.Z. et al. | 2018 |
| 56 | A machine Learning Algorithm to Predict Severe Sepsis and Septic Shock: Development, Implementation, and Impact on Clinical Practice | Giannini et al.   | 2019 |
| 57 | A minimal set of physiomarkers in continuous high frequency data streams predict adult sepsis onset earlier                          | van Wyk et al.    | 2018 |
| 58 | An Interpretable Machine Learning Model for Accurate Prediction of Sepsis in the ICU                                                 | Nemati et al.     | 2018 |
| 59 | Using peptidomics and machine learning techniques to predict mortality of patients with septic shock                                 | Byrne, H.         | 2018 |
| 60 | Mortality prediction of septic patients in the Emergency Department based on Machine Learning                                        | Perng et al.      | 2019 |
| 61 | From vital signs to clinical outcomes for patients with sepsis: a machine learning basis for a clinical decision support system      | Gultepe et al.    | 2014 |
| 62 | Semantically Enhanced Dynamic Bayesian Network for Detecting Sepsis Mortality Risk in ICU Patients with Infection                    | Wang, T. et al.   | 2018 |
| 63 | Prediction of in-hospital Mortality in Emergency Department patient with sepsis: A Local Big Data-Driven, Machine Learning Approach  | Taylor et al.     | 2016 |
| 64 | Heart rate variability based machine learning models for risk prediction of suspected sepsis patients in the emergency department    | Chiew et al.      | 2019 |

|    |                                                                                                                                           |                     |      |
|----|-------------------------------------------------------------------------------------------------------------------------------------------|---------------------|------|
| 65 | Severe sepsis mortality prediction with logistic regression over latent factors                                                           | Ribas et al.        | 2012 |
| 66 | From data to optimal decision making: a data-driven, probabilistic machine learning approach to decision support for patients with sepsis | Tsoukalas et al.    | 2015 |
| 67 | A machine learning-based model for 1-year mortality prediction in patients admitted to an Intensive Care Unit with a diagnosis of sepsis  | García-Gallo et al. | 2018 |
| 70 | Early Diagnosis and Prediction of Sepsis Shock by Combining Static and Dynamic Information Using Convolutional-LSTM                       | Lin et al.          | 2018 |
| 71 | Data-driven discovery of a novel sepsis pre-shock state predicts impending septic shock in the ICU                                        | Liu et al.          | 2019 |

| Place of publication                                            | ML Task(s)                                     | Primary purpose                                                                                                                                |
|-----------------------------------------------------------------|------------------------------------------------|------------------------------------------------------------------------------------------------------------------------------------------------|
| IEEE ACCESS                                                     | Sepsis Detection                               | Diagnosis accuracy and identify the most important biomarkers                                                                                  |
| Computers in Biology and Medicine An international              | Sepsis Prediction<br>Sepsis Detection          | Develop detection models for the early stage of sepsis using deep learning methodologies                                                       |
| Journal of Machine Learning Research (JMLR)                     | Sepsis Prediction<br>Sepsis Detection          | Predict sepsis before it occurs with laboratory results, vital signs and medications                                                           |
| Advances in Information Systems and Technologies                | Sepsis Detection                               | Support doctor's decision-making on predicting the Sepsis level                                                                                |
| Journal of the American Medical Informatics Association (JAMIA) | Sepsis Detection                               | Detect the presence of sepsis soon after the patient visits the emergency department                                                           |
| Journal of Medical Internet Research (JMIR)                     | Sepsis Prediction<br>Sepsis Detection          | Study and validate a sepsis prediction method, using a minimal set of variables                                                                |
| BMJ OPEN                                                        | Sepsis Severity Prediction<br>Sepsis Detection | Detection and prediction, using only six vital signs                                                                                           |
| Annals of Emergency Medicine                                    | Sepsis Detection                               | Developed and evaluated a new screening tool for sepsis, the Risk of Sepsis (RoS) score                                                        |
| Diagnostics                                                     | Sepsis Detection                               | Detection of sepsis in high-risk patients (aged 45 or older and with a length-of-stay of four days or longer) using a minimal set of variables |
| Computers in Biology and Medicine                               | Sepsis Prediction<br>Sepsis Detection          | Increase timely sepsis detection and prediction using electronic health records and compares the performance with the existing methods         |
| Research in nursing and health                                  | Sepsis Detection                               | Develops and verifies an Automated Sepsis Risk, applying data mining techniques to electronic health records                                   |
| Critical Care Medicine                                          | Sepsis Detection                               | Predict the risk of sepsis using the vital signs and blood test results                                                                        |
| PLOS ONE                                                        | Sepsis Detection                               | Identifies patient with suspect of sepsis in the emergency department with free text data, vital signs and demographic data                    |
| IOP Publishing                                                  | Sepsis Detection                               | Classifies sepsis, severe sepsis and systemic inflammatory response syndrome                                                                   |

|                                                                                                    |                      |                                                                                                                            |
|----------------------------------------------------------------------------------------------------|----------------------|----------------------------------------------------------------------------------------------------------------------------|
| The Spine Journal                                                                                  | Sepsis Detection     | Develop a machine learning algorithm that can identify post surgical sepsis based on unstructured patient notes            |
| Artificial Intelligence in Medicine                                                                | Sepsis Prediction    | Develop a machine learning sepsis prediction model and validate it by using an independent ground truth of sepsis status   |
| Computers in Biology and Medicine                                                                  | Sepsis Prediction    | Predict sepsis using recurrent neural networks and performance comparison with InSight                                     |
| PLOS ONE                                                                                           | Sepsis Prediction    | Predict sepsis, myocardial infarction or vancomycin antibiotic administration                                              |
| Scientific Reports                                                                                 | Sepsis Prediction    | Predict septic shock in the 48 hours preceding its onset                                                                   |
| IEEE International Conference on Healthcare Informatics                                            | Sepsis Prediction    | Develops models for predicting sepsis, and compare their performance                                                       |
| Critical Care Medicine                                                                             | Sepsis Prediction    | Develop and implement a machine learning algorithm ("EWS 2.0") to predict severe and septic shock                          |
| International Journal of Medical Informatics                                                       | Sepsis Prediction    | Detect at-risk sepsis patients at an early stage                                                                           |
| Critical Care Medicine                                                                             | Sepsis Prediction    | Develops and validates sepsis expert algorithm for early prediction of sepsis                                              |
| FIB Universitat de Barcelona                                                                       | Mortality Prediction | Analyses peptidomics data and prediction of risk of death of patients in septic shock                                      |
| Journal of Clinical Medicine                                                                       | Mortality Prediction | Predict mortality (within 72 h and 28 days) of suspected infected patients in Emergency Department                         |
| Journal of the American Medical Informatics Association (JAMIA)                                    | Mortality Prediction | Develops a system to identify patients at high risk for hyperlactatemia and laboratory studies                             |
| ArXiv                                                                                              | Mortality Prediction | Identifies patient at risk of life-threatening sepsis                                                                      |
| Academic Emergency Medicine Official Journal of the Society for Academic Emergency Medicine (SAEM) | Mortality Prediction | Predictive analytics in emergency care with clinical decision rules                                                        |
| Scientific Reports                                                                                 | Mortality Prediction | Identification of high-risk patients in ED department by means of machine learning, including HRV parameters as predictors |

|                                                         |                            |                                                                                             |
|---------------------------------------------------------|----------------------------|---------------------------------------------------------------------------------------------|
| Expert systems with applications                        | Mortality prediction       | Model based to obtain such new sets of descriptors, or prognostic factors                   |
| Journal of Medical Internet Research (JMIR)             | Mortality Prediction       | Develops and assess method that deduce the current state of patients with sepsis            |
| Medicina Intensiva                                      | Mortality Prediction       | Develops a model for predicting 1-year mortality in critical patients diagnosed with sepsis |
| IEEE International Conference on Healthcare Informatics | Sepsis Severity Prediction | Obtains local characteristics of EHRs to predict is septic shock                            |
| Scientific Reports                                      | Septic Shock Prediction    | Prediction of septic shock in ICU patients                                                  |

| Key findings                                                                                                                                                                  | Data set and target country                                                                                                               |
|-------------------------------------------------------------------------------------------------------------------------------------------------------------------------------|-------------------------------------------------------------------------------------------------------------------------------------------|
| Decision making tool for the diagnosis of sepsis                                                                                                                              | 77 patients China                                                                                                                         |
| Verifies capacity and improves the performance of advanced neural networks                                                                                                    | 5,789 patients MIMIC-II                                                                                                                   |
| Learning model that detects sepsis early and also optimal treatment strategies                                                                                                | 51,697 patients USA                                                                                                                       |
| Predicts sepsis level in real-time using Data Mining                                                                                                                          | 1,749 patients Portugal                                                                                                                   |
| Model to perform the detect specific diseases such as sepsis                                                                                                                  | 3,100 patients USA                                                                                                                        |
| Tool for predicting sepsis onset                                                                                                                                              | 22,853 ICU stays MIMIC-III                                                                                                                |
| Predicts and identifies septic shock 4 hours prior to onset                                                                                                                   | 90,535 patients UCSF USA<br>Transfer learning:<br>21,604 patients MIMIC-III                                                               |
| The RoS score demonstrated significantly better discrimination than the benchmarks (SOFA, qSOFA, SIRS, MEWS, NEWS) across all time thresholds (1, 3, 6, 12, 24 hours after an | 2,759,529 emergency departments patients USA                                                                                              |
| Outperforms the standard clinical scores (SIRS, MEWS and qSOFA) using data from a 3-hour window and only 6 variables                                                          | 122,672 records of high-risk patients (aged 45 or older and length-of-stay of four days or longer)<br>Data from 2 Medical centers in USA. |
| Algorithm predicts sepsis up to 48h in advance, trained and tested on different patient populations                                                                           | 17,467,987 (UCSF)<br>53,542 (MIMIC-III) trained and tested on separate datasets                                                           |
| Increases the effectiveness of sepsis care by helping nurses to tailor the care and monitoring of sepsis risk                                                                 | 2020 patients Korea                                                                                                                       |
| Validate the risk of sepsis models using data from different hospitals                                                                                                        | 26,247 development patients United Kingdom<br>30,996 validation patients United                                                           |
| Vital signs and demographic information, utilizing free text drastically improves the discriminatory ability of identifying infection                                         | 230,936 visits USA                                                                                                                        |
| Suggests the combinatory use of cardiovascular spectrum analysis for classifies sepsis                                                                                        | 26 patients Australia                                                                                                                     |

|                                                                                                                                     |                                                                                         |
|-------------------------------------------------------------------------------------------------------------------------------------|-----------------------------------------------------------------------------------------|
| Model used for real-time surveillance and for automated identification of patient complications with sepsis                         | 947 patients (15,004 notes) MIMIC-III                                                   |
| Achieves state-of-the-art AUC scores                                                                                                | 620 patients in surgical ICU Germany                                                    |
| Predicts sepsis 3h prior to sepsis onset and compare the performance for 6 and 12h prediction time for both approaches              | 31,238-31,575 patients (MIMIC-III)                                                      |
| Predicts sepsis one day prior to onset                                                                                              | 56,841 ICU admissions (36,176 patients) MIMIC-III                                       |
| LSTM network detects septic shock earlier than a Cox proportional hazards model.                                                    | 50373 ICU admissions(MIMIC-III)                                                         |
| Performs the correct identification of sepsis ICU patients before onset is emphasized                                               | 19,358 patients MIMIC-III                                                               |
| The tool triggered 5-6 hours prior to the onset of severe sepsis or septic shock                                                    | 54,464 non-ICU patients USA                                                             |
| Models to predict sepsis 5h before the onset                                                                                        |                                                                                         |
| Predicts the onset of sepsis in an ICU patient 4-12 hours prior to clinical recognition with data available in the ICU in real-time | 27,527 development patients USA<br>42,411 validation patients MIMIC-III                 |
| Classification of patient outcome, from patient peptidome taken 48 hours after shock diagnosis                                      | 29 patients ShockOmics                                                                  |
| Mortality prediction with variables obtained during ED stay                                                                         | 88,789 patients admitted to Emergency Department (Chang Gung Memorial Hospital). Taiwan |
| Lactate levels and mortality risk can be provided for the mortality prediction                                                      | 741 patients USA                                                                        |
| Derives a mortality risk and compares the predictive accuracy with the score systems                                                | 19,623 patients (24,506 ICU stays) MIMIC-II                                             |
| Traditional analytic techniques for predicting in-hospital mortality of ED patients with sepsis                                     | 4,676 patients (5,278 visits) USA                                                       |
| Outperforms the standard clinical scores (qSOFA, NEWS and MEWS) using 6 vital signs plus 22 HRV parameters                          | 214 patients Singapore                                                                  |



|                                                                                                                                                                                     |                                                                                                                     |
|-------------------------------------------------------------------------------------------------------------------------------------------------------------------------------------|---------------------------------------------------------------------------------------------------------------------|
| Derives a prognostic score from a set of physiopathologic and therapeutic variables                                                                                                 | 156 patients<br>Spain                                                                                               |
| Provides a framework for sepsis treatment, favorable actions, predict mortality and length of stay with high accuracy                                                               | 745 patients USA                                                                                                    |
| The clinical information of the first 24hr after admission, develop a 1-year mortality prediction model                                                                             | 5,650 admissions of patients USA                                                                                    |
| The early detection of sepsis can be predicted <5 hours in the future                                                                                                               | 3,738 visits (145,421 total events) USA                                                                             |
| A novel pre-shock state is defined. Models developed calculate a risk score every time that new data is available for a patient. This risk score determines if a patient is in pre- | 15,930 patients with suspected infection from MIMIC-III<br>~140,000 patients from eICU database used for validation |

| Cases                                                              | Contribution of the project                                                                                   |
|--------------------------------------------------------------------|---------------------------------------------------------------------------------------------------------------|
| 42 sepsis                                                          | Clinical decision support tool for the diagnosis of sepsis                                                    |
| 360 sepsis                                                         | Early detection of sepsis after 3 h with 5 h of data collection                                               |
| 21,4% sepsis                                                       | Clinical baselines, and improves on a previous related model for detecting sepsis                             |
| 334 severe sepsis<br>1,415 septic shock                            | Predicts sepsis level for alerts in ICU                                                                       |
| 20% sepsis                                                         | Detects sepsis with variables that are mostly collected at the bedside and WBC                                |
| 2,577 sepsis                                                       | Predicts sepsis with health record data.<br>Comparison between inSight vs qSofa, MEWS, SIRS, SOFA.            |
| UCSF USA<br>1,1179 sepsis<br>349 severe sepsis<br>614 septic shock | Detection and prediction of three sepsis-related gold standards, using only six vital signs                   |
| 54,661 sepsis                                                      | This new screening tool identify patients at risk for sepsis better than the benchmark                        |
| 22,817 sepsis                                                      | A small set of 6 variables is enough to detect sepsis in high-risk patients                                   |
| 91,445 patients (UCSF)<br>21,507 patients (MIMIC-III)              | Predicts sepsis up to 48 h in advance and identifies sepsis onset more accurately than commonly used tools    |
| 404 sepsis                                                         | Seven predictors included in the Auto-SepRAS after initial analysis were admission via the ED                 |
| Development<br>4,861 sepsis<br>1,387 severe sepsis                 | Estimate risk of sepsis for emergency medical admissions                                                      |
| 32,103 infections                                                  | Uses routinely collected free text data at triage to predict infection                                        |
| 18 sepsis                                                          | Spectral indices of autonomic neural activity, to ascertain its diagnostic usefulness in the sepsis continuum |

|                                                                                                         |                                                                                                                                                                                                |
|---------------------------------------------------------------------------------------------------------|------------------------------------------------------------------------------------------------------------------------------------------------------------------------------------------------|
| 3,547 notes from patients positive for sepsis                                                           | Identify post-surgical sepsis based on unstructured patient notes                                                                                                                              |
| 200 sepsis                                                                                              | Proposes a questionnaire for clinical practitioners as an alternative of standard severity scores for sepsis status labeling, in order to avoid bias induced by using the same information for |
| Diagnosis during patient stay: sepsis(995.91), severe sepsis(995.92), and/or septic shock(785.52)       | Compares the model developed with InSight. Demonstrates the prediction performance and show the correct detection of sepsis onset for a retrospective analysis                                 |
| ICU admissions with lenght of stay 2 days or longer (n = 56,841)                                        | Demonstrates the input variables are important to predict and could provide a degree of interpretability for clinicians                                                                        |
| 11224 sepsis cases                                                                                      | Predictions are more realiable closer to the onset of septic shock                                                                                                                             |
| 4,915 sepsis                                                                                            | Predictive models to improve in ICU the earlier detection of patients at risk of becoming septic                                                                                               |
| 347 predict to develop severe sepsis or septic shock                                                    | Decrease in time to ICU transfer but no significant change in mendian length of stay in the ICU or all-cause mortality                                                                         |
| 904 patients<br>377 patients had developed sepsis and had data at least 3h prior to the onset of sepsis | Predict the onset of sepsis in patients who are admitted to ICU using continuos minute-by-minute data captured at the beside                                                                   |
| USA<br>2,375 sepsis<br>MIMIC-III                                                                        | Sepsis expert algorithm for early prediction of sepsis                                                                                                                                         |
| 6 deaths                                                                                                | Identify 8 relevant peptides that may provide some clinical insight into the pathophysiology of septic shock                                                                                   |
| 42,220 patients that had blood culture collected and had received intravenous antibiotics               | Deep learning predicts mortality better than other machine learning methods                                                                                                                    |
| 151 sepsis (52 deaths)<br>261 deaths in the dataset                                                     | New scheme for the prediction of lactate levels and mortality risk from patient vital signs and WBC                                                                                            |
| 2,829 deaths                                                                                            | Reduces time and costs necessary to implement a physician's knowledge/reasoning logic into operational systems                                                                                 |
| 260 deaths                                                                                              | Demonstrates several notable advantages for clinical predictive analytics                                                                                                                      |
| 40 30-day in-hospital deaths                                                                            | A machine learning model incorporating HRV can improve ED mortality prediction compared to standard predictors                                                                                 |

|                                                                     |                                                                                                 |
|---------------------------------------------------------------------|-------------------------------------------------------------------------------------------------|
| 34% mortality                                                       | Extracted indicators are then applied to the prediction of mortality caused by sepsis           |
| 170 sepsis                                                          | Patient information used to predict mortality and length of stay intervals                      |
| 43,3% 1-year mortality rate                                         | Generates of a customized model for accurate mortality prediction                               |
| 1,869 positives<br>1,869 negatives                                  | Develops framework for evaluation: visit level early diagnosis and event level early prediction |
| 3,475 septic shock (MIMIC-III)<br>No information available for eICU | A way to identify a patient in a novel pre-shock state is proposed.                             |

| Techniques used                                                                   | Performance metrics                                                                                              |
|-----------------------------------------------------------------------------------|------------------------------------------------------------------------------------------------------------------|
| Kernel Extreme Learning Machine                                                   | Accuracy<br>Sensitivity, specificity<br>Matthews Correlation Coefficient                                         |
| Deep Feedforward Network<br>Long Short-Term Memory                                | Area Under ROC<br>Sensitivity, Specificity                                                                       |
| Multi-output Gaussian Processes Recurrent Neural Network (Long Short-Term Memory) | Area Under ROC<br>Area Under PR                                                                                  |
| Support Vector Machine<br>Decision Trees<br>Naive Bayes                           | Accuracy<br>Sensitivity, Specificity                                                                             |
| Dynamic Bayesian Network                                                          | Area Under ROC<br>Sensitivity, Specificity<br>Precision (Positive Predictive Value)<br>Negative Predictive Value |
| InSight                                                                           | Area Under ROC<br>Area Under PR                                                                                  |
| Gradient Tree Boosting (InSight)                                                  | Area Under ROC<br>Sensitivity, Specificity                                                                       |
| Gradient-Boosted Decision Trees                                                   | Alert rate<br>Area Under ROC<br>Sensitivity, Specificity<br>Precision (Positive Predictive Value)                |
| Gradient-Boosted Decision Trees                                                   | Area Under ROC<br>Sensitivity, Specificity<br>Positive Predictive Value<br>Negative Predictive Value             |
| Gradient-Boosted Decision Trees                                                   | Area Under ROC<br>LR+, LR-<br>Sensitivity, Specificity<br>Diagnostic Odds Ratio                                  |
| Logistic Regression                                                               | Area Under ROC<br>Sensitivity, Specificity<br>Precision (Positive Predictive Value)<br>Negative Predictive Value |
| Logistic Regression                                                               | Area Under ROC<br>Sensitivity, Specificity                                                                       |
| Support Vector Machine                                                            | Area Under ROC<br>Sensitivity, Specificity<br>Precision (Positive Predictive Value)<br>Negative Predictive Value |
| Support Vector Machine                                                            | Accuracy<br>Sensitivity, Specificity<br>Precision (Positive Predictive Value)<br>Negative Predictive Value       |

|                                                                                              |                                                                                                                  |
|----------------------------------------------------------------------------------------------|------------------------------------------------------------------------------------------------------------------|
| Support Vector Machine                                                                       | Area Under ROC<br>Accuracy<br>Sensitivity, Specificity                                                           |
| Linear Regression<br>Neural Network                                                          | Area Under ROC                                                                                                   |
| Recurrent Neural Networks                                                                    | Area Under ROC<br>Sensitivity, Specificity                                                                       |
| Long Short-Term Memory<br>Recurrent Neural Networks                                          | Area Under ROC<br>PPV<br>Sensitivity                                                                             |
| Long Short-Term Memory                                                                       | AUC                                                                                                              |
| Logistic Model Trees<br>Logistic Regression<br>Support Vector Machine                        | Area Under ROC<br>Sensitivity, Specificity<br>Precision (Positive Predictive Value)<br>Negative Predictive Value |
| Random Forest                                                                                | Sensitivity, Specificity<br>Precision (Positive Predictive Value)<br>Likelihood ratios                           |
| Random Forest                                                                                | Area Under ROC<br>F1 score<br>Sensitivity, Specificity<br>Accuracy, PPV                                          |
| Weilbull-Cox Hazards model                                                                   | Area Under ROC<br>Accuracy<br>Sensitivity, Specificity                                                           |
| Logistic Regression<br>Support Vector Machine<br>Multilayer Preceptron                       | Area Under ROC<br>Accuracy<br>Sensitivity, Specificity<br>Precision (Positive Predictive Value)                  |
| k-Nearest Neighbors<br>Random Forest<br>SoftMax<br>SVM                                       | AUC<br>Accuracy                                                                                                  |
| Naïve Bayes<br>Support Vector Machine                                                        | Area Under ROC<br>Accuracy<br>Sensitivity, Specificity<br>F-score                                                |
| Dynamic Bayesian Network                                                                     | Area Under ROC<br>Sensitivity, Specificity                                                                       |
| Random Forest<br>Logistic Regression<br>Classification and Regression Trees                  | Area Under ROC                                                                                                   |
| k-Nearest Neighbors<br>Random Forest<br>Adaptive Boosting<br>Gradient-Boosted Decision Trees | Area Under ROC<br>Sensitivity<br>Precision (Positive Predictive Value)<br>F1                                     |

|                                                                                 |                                                                                     |
|---------------------------------------------------------------------------------|-------------------------------------------------------------------------------------|
| Logistic Regression                                                             | Area Under ROC<br>Sensitivity, Specificity                                          |
| Support Vector Machine                                                          | Area Under ROC<br>Accuracy                                                          |
| Least Absolute Shrinkage and Selection Operator<br>Stochastic Gradient Boosting | Area Under ROC                                                                      |
| Long Short-Term Memory                                                          | Area Under ROC<br>Sensitivity<br>Precision (Positive Predictive Value)              |
| Generalized Linear Model<br>XGBoost<br>Recurrent Neural Network                 | Area Under ROC<br>Sensitivity, Specificity<br>Precision (Positive Predictive Value) |

| URL                                                                                                                       |
|---------------------------------------------------------------------------------------------------------------------------|
| <a href="https://doi.org/10.1109/ACCESS.2018.2867728">https://doi.org/10.1109/ACCESS.2018.2867728</a>                     |
| <a href="https://doi.org/10.1016/j.compbiomed.2017.08.015">https://doi.org/10.1016/j.compbiomed.2017.08.015</a>           |
| <a href="http://arxiv.org/abs/1708.05894">http://arxiv.org/abs/1708.05894</a>                                             |
| <a href="https://doi.org/10.1007/978-3-642-36981-0_19">https://doi.org/10.1007/978-3-642-36981-0_19</a>                   |
| <a href="https://www.ncbi.nlm.nih.gov/pmc/articles/PMC3540576/">https://www.ncbi.nlm.nih.gov/pmc/articles/PMC3540576/</a> |
| <a href="https://doi.org/10.2196/medinform.5909">https://doi.org/10.2196/medinform.5909</a>                               |
| <a href="http://doi.org/10.1136/bmjopen-2017-017833">http://doi.org/10.1136/bmjopen-2017-017833</a>                       |
| <a href="https://doi.org/10.1016/j.annemergmed.2018.11.036">https://doi.org/10.1016/j.annemergmed.2018.11.036</a>         |
| <a href="https://doi.org/10.3390/diagnostics9010020">https://doi.org/10.3390/diagnostics9010020</a>                       |
| <a href="https://doi.org/10.1016/j.compbiomed.2019.04.027">https://doi.org/10.1016/j.compbiomed.2019.04.027</a>           |
| <a href="https://doi.org/10.1002/nur.21734">https://doi.org/10.1002/nur.21734</a>                                         |
| <a href="https://doi.org/10.1136/bmjopen-2018-022939">https://doi.org/10.1136/bmjopen-2018-022939</a>                     |
| <a href="https://doi.org/10.1371/journal.pone.0174708">https://doi.org/10.1371/journal.pone.0174708</a>                   |
| <a href="https://doi.org/10.1088/0967-3334/31/6/004">https://doi.org/10.1088/0967-3334/31/6/004</a>                       |



|                                                                                                             |
|-------------------------------------------------------------------------------------------------------------|
| <a href="https://doi.org/10.1016/j.spinee.2018.06.068">https://doi.org/10.1016/j.spinee.2018.06.068</a>     |
| <a href="https://doi.org/10.1016/j.artmed.2019.101725">https://doi.org/10.1016/j.artmed.2019.101725</a>     |
| <a href="https://doi.org/10.1016/j.ijmedinf.2018.12.002">https://doi.org/10.1016/j.ijmedinf.2018.12.002</a> |
| <a href="https://doi.org/10.1371/journal.pone.0211057">https://doi.org/10.1371/journal.pone.0211057</a>     |
| <a href="https://doi.org/10.1038/s41598-019-51219-4">https://doi.org/10.1038/s41598-019-51219-4</a>         |
| <a href="https://doi.org/10.1109/SIEDS.2015.7116970">https://doi.org/10.1109/SIEDS.2015.7116970</a>         |
| <a href="https://doi.org/10.1097/CCM.0000000000003891">https://doi.org/10.1097/CCM.0000000000003891</a>     |
| <a href="https://doi.org/10.1016/j.ijmedinf.2018.12.002">https://doi.org/10.1016/j.ijmedinf.2018.12.002</a> |
| <a href="https://doi.org/10.1097/CCM.0000000000002936">https://doi.org/10.1097/CCM.0000000000002936</a>     |
| <a href="https://upcommons.upc.edu/handle/2117/119044">https://upcommons.upc.edu/handle/2117/119044</a>     |
| <a href="https://doi.org/10.3390/jcm8111906">https://doi.org/10.3390/jcm8111906</a>                         |
| <a href="https://doi.org/10.1136/amiajnl-2013-001815">https://doi.org/10.1136/amiajnl-2013-001815</a>       |
| <a href="https://arxiv.org/pdf/1806.10174.pdf">https://arxiv.org/pdf/1806.10174.pdf</a>                     |
| <a href="https://doi.org/10.1111/acem.12876">https://doi.org/10.1111/acem.12876</a>                         |
| <a href="https://doi.org/10.1097/MD.0000000000014197">https://doi.org/10.1097/MD.0000000000014197</a>       |

|                                                                                                       |
|-------------------------------------------------------------------------------------------------------|
| <a href="https://doi.org/10.1016/j.eswa.2011.08.054">https://doi.org/10.1016/j.eswa.2011.08.054</a>   |
| <a href="https://doi.org/10.2196/medinform.3445">https://doi.org/10.2196/medinform.3445</a>           |
| <a href="https://doi.org/10.1016/j.medin.2018.07.016">https://doi.org/10.1016/j.medin.2018.07.016</a> |
| <a href="https://doi.org/10.1109/ICHI.2018.00032">https://doi.org/10.1109/ICHI.2018.00032</a>         |
| <a href="https://doi.org/10.1038/s41598-019-42637-5">https://doi.org/10.1038/s41598-019-42637-5</a>   |
